# Supplementary material for: Clinically Significant High-Grade AV Block as a Reversible Cause for Acute Kidney Injury in Hospitalized Patients—A Propensity Score Matched Cohort
Source: MDPI journal article supplement (doi:10.3390/jcm10112424), 2021-05-30
Supplement: s1 [file s1]

## Supplementary Table

**Table S1.** Baseline characteristics of the entire cohort before matching.

| Parameter                                                              | No HDAVB            | HDAVB               | p-value | SMD   |
|------------------------------------------------------------------------|---------------------|---------------------|---------|-------|
| n                                                                      | 1978                | 81                  |         |       |
| Age (years) - Mean $\pm$ SD                                            | 68.8 (15.5)         | 80.3 (10.9)         | <0.001  | 0.862 |
| Female Gender (%)                                                      | 696 (35.2)          | 41 (50.6)           | 0.005   | 0.316 |
| History of hypertension (%)                                            | 795 (40.2)          | 46 (56.8)           | 0.003   | 0.337 |
| History of dyslipidemia (%)                                            | 638 (32.3)          | 35 (43.2)           | 0.039   | 0.227 |
| History of diabetes (%)                                                | 490 (24.8)          | 24 (29.6)           | 0.322   | 0.109 |
| History of ischemic heart disease (%)                                  | 1013 (51.2)         | 24 (29.6)           | <0.001  | 0.451 |
| History of heart failure (%)                                           | 454 (23.0)          | 10 (12.3)           | 0.025   | 0.281 |
| Beta blocker treatment (%)                                             | 694 (35.1)          | 33 (40.7)           | 0.297   | 0.117 |
| ACEI or ARB treatment (%)                                              | 696 (35.2)          | 34 (42.0)           | 0.211   | 0.140 |
| Mineralocorticoid agonist treatment (%)                                | 144 ( 7.3)          | 3 ( 3.7)            | 0.220   | 0.157 |
| Baseline eGFR (ml/kg/min/1.73m <sup>2</sup> ) - Mean $\pm$ SD          | 68.6 (24.3)         | 67.2 (19.8)         | 0.618   | 0.062 |
| Baseline creatinine (mg/dl) - Median [IQR]                             | 1.0 [0.8, 1.2]      | 0.9 [0.7, 1.1]      | 0.001   | 0.174 |
| Baseline creatinine acquiring prior to admission (days) - Median [IQR] | 128.1 [49.9, 243.1] | 189.8 [90.0, 282.4] | 0.001   | 0.365 |

High grade AV block (HGAVB); IHD- Ischemic Heart Disease; ACEI – Angiotensin Converting Enzyme Inhibitor; ARB Angiotensin Receptor Blockers; MRA Mineralocorticoid Receptor Antagonist; eGFR estimated Glomerular Filtration Rate.

**Table S2.** Seed model for multivariate logistic regression shown in Table-4.

| Parameter                       | OR [95% CI]         | p-value |
|---------------------------------|---------------------|---------|
| Age (years)                     | 0.99 [0.9 - 0.818]  | 0.818   |
| Baseline Creatinine (mg/dL)     | 1.28 [0.03 - 0.911] | 0.911   |
| Diastolic Blood Pressure (mmHg) | 1.01 [0.93 - 0.789] | 0.789   |
| Saturation (%)                  | 0.8 [0.56 - 0.202]  | 0.202   |
| Pulse (bpm)                     | 1.05 [0.99 - 0.108] | 0.108   |
| Systolic Blood Pressure (mmHg)  | 0.94 [0.87 - 0.112] | 0.112   |
| Hemoglobin (g/dL)               | 0.73 [0.39 - 0.276] | 0.276   |
| WBC (cells/nL)                  | 1.55 [1.15 - 0.009] | 0.009   |
| PLT (cells/nL)                  | 0.98 [0.97 - 0.099] | 0.099   |
| Na (cells/nL)                   | 1.11 [0.92 - 0.344] | 0.344   |
| K (cells/nL)                    | 1.02 [0.2 - 0.982]  | 0.982   |
| eGFR (ml/min/m <sup>2</sup> )   | 0.96 [0.87 - 0.492] | 0.492   |
| History of hypertension         | 3.22 [0.42 - 0.269] | 0.269   |
| History of hyperlipidemia       | 1.2 [0.14 - 0.869]  | 0.869   |
| History of Diabetes             | 0.94 [0.1 - 0.95]   | 0.95    |
| Ischemic Hear disease           | 1.86 [0.23 - 0.558] | 0.558   |
| Heart Failure                   | 2.23 [0.08 - 0.637] | 0.637   |
| Use of beta blockers            | 0.12 [0.01 - 0.049] | 0.049   |
| Use of ACE/ARB/MRA              | 5.02 [0.57 - 0.169] | 0.169   |
| Female Gender                   | 1.15 [0.15 - 0.894] | 0.894   |

OR – Odds Ratio; WBC- White Blood Cells; ACEI – Angiotensin Converting Enzyme Inhibitor; ARB Angiotensin Receptor Blockers; MRA Mineralocorticoid Receptor Antagonist; eGFR estimated Glomerular Filtration Rate.
